# Supplementary material for: Claw shape variation in oribatid mites of the genera Carabodes and Caleremaeus: exploring the interplay of habitat, ecology and phylogenetics
Source: PeerJ journal article supplement (doi:10.7717/peerj.16021), 2023-09-25

**A)**

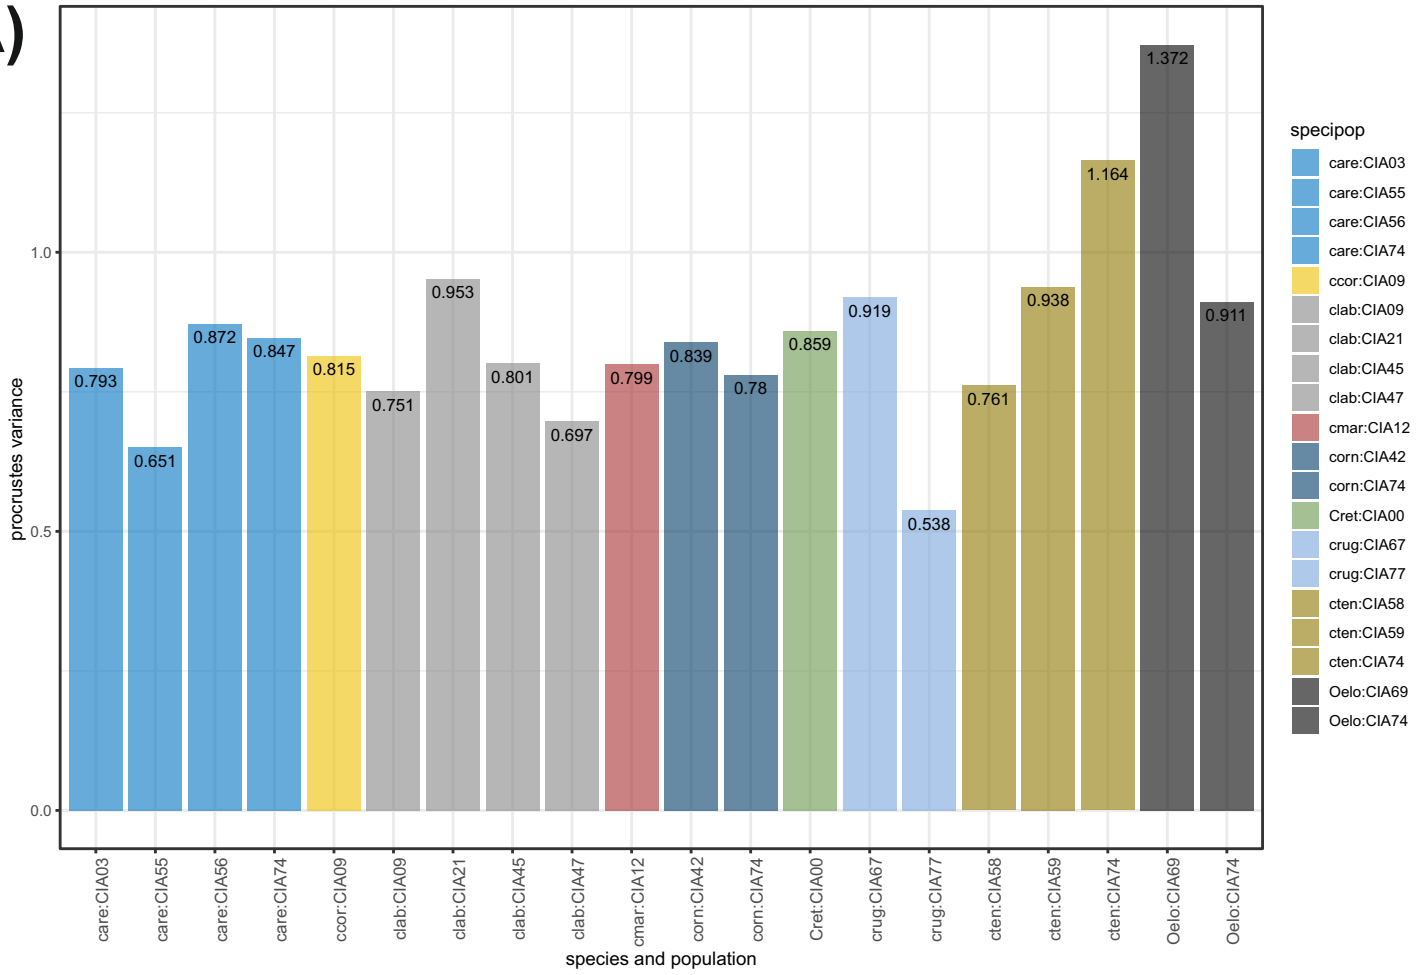

**B)**

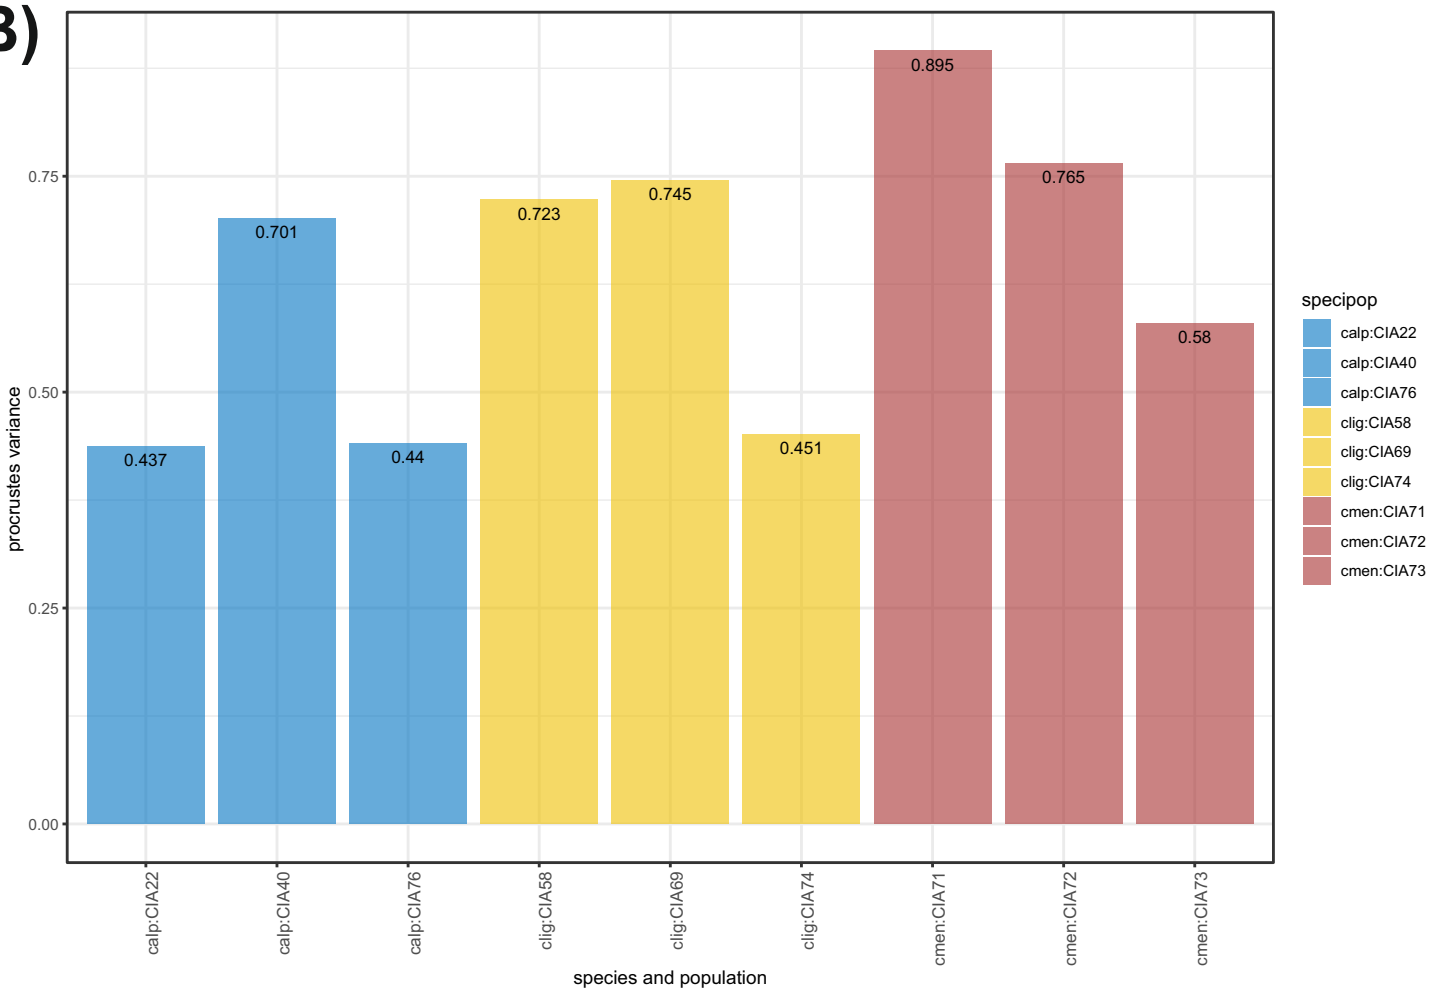

Supplement: Figure_S1.pdf [file Figure_S1.pdf]
