# Supplementary material for: Claw shape variation in oribatid mites of the genera Carabodes and Caleremaeus: exploring the interplay of habitat, ecology and phylogenetics
Source: PeerJ journal article supplement (doi:10.7717/peerj.16021), 2023-09-25

gamma

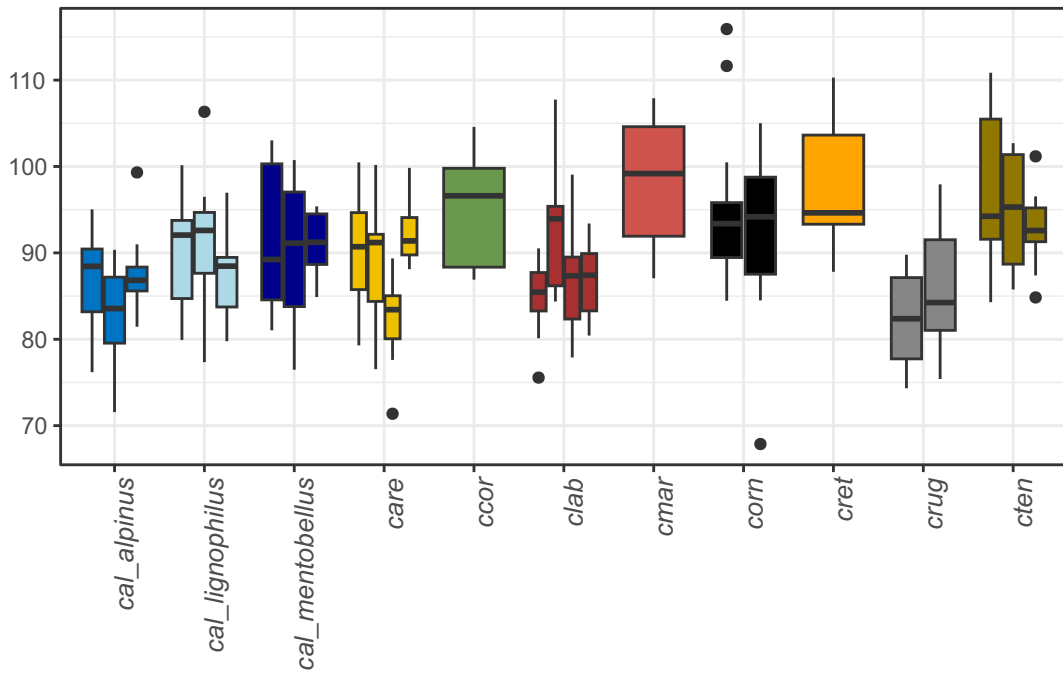

clawlength

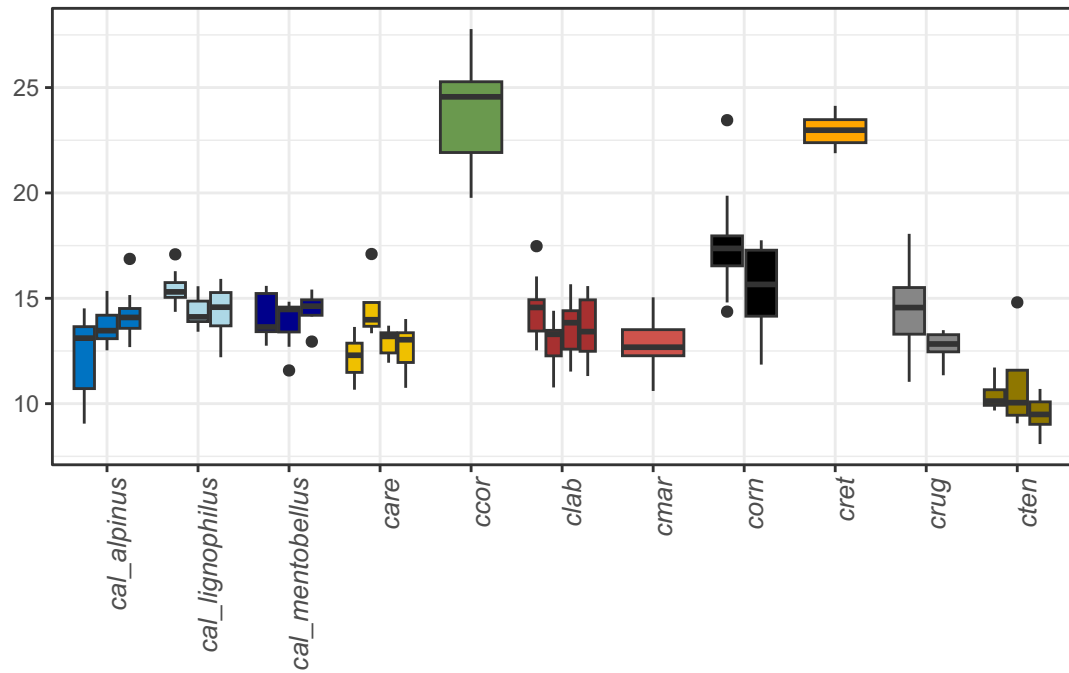

cl/bL

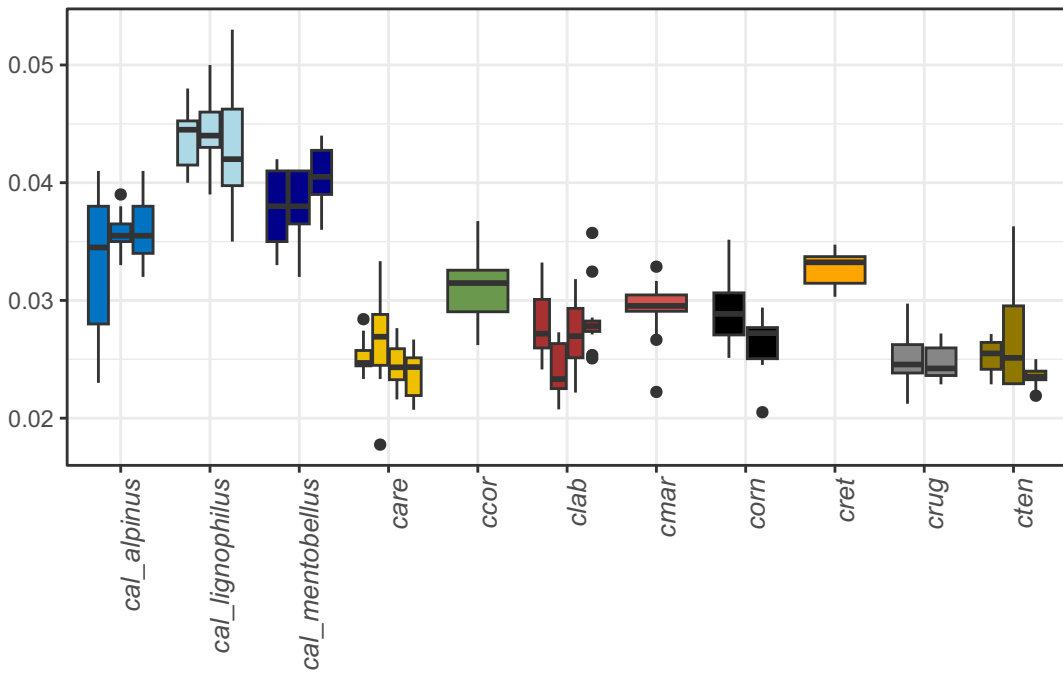

bodylength

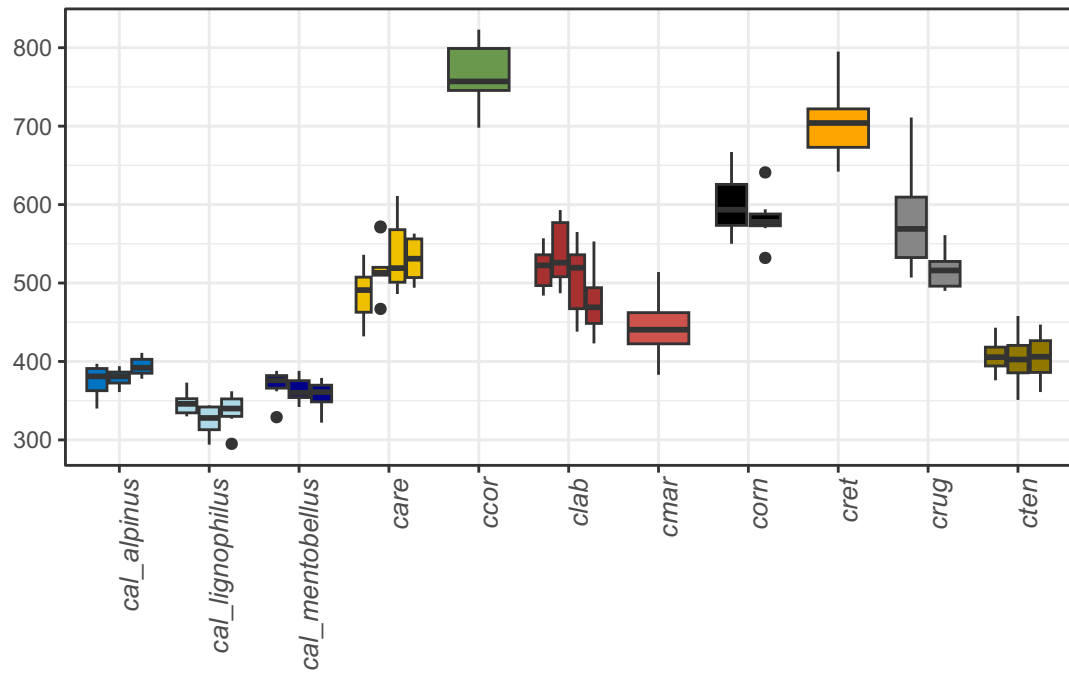

Supplement: Figure_S3.pdf [file Figure_S3.pdf]
